# Supplementary material for: Enzyme-less and selective electrochemical sensing of catechol and dopamine using ferrocene bound Nafion membrane modified electrode
Source: Royal Society of Chemistry journal article supplement (doi:10.1039/c0ay00430h), 2010-01-01
Supplement: c0ay00430h.pdf [file c0ay00430h.pdf]

## Supporting Information

### Enzyme-less and Selective Electrochemical Sensing of Catechol and Dopamine Using Ferrocene Bound Nafion Membrane Modified Electrode

Annamalai Senthil Kumar,<sup>\*a</sup> Puchakayala Swetha,<sup>a</sup> K.Chandrasekara Pillai<sup>b</sup>

<sup>a</sup>*Environmental and Analytical Chemistry Division, School of Advanced Sciences, Vellore  
Institute of Technology University, Vellore 632 014, India*

<sup>b</sup>*Department of Chemical Engineering, National Taiwan University of Science and Technology,  
Taipei 106, Taiwan*

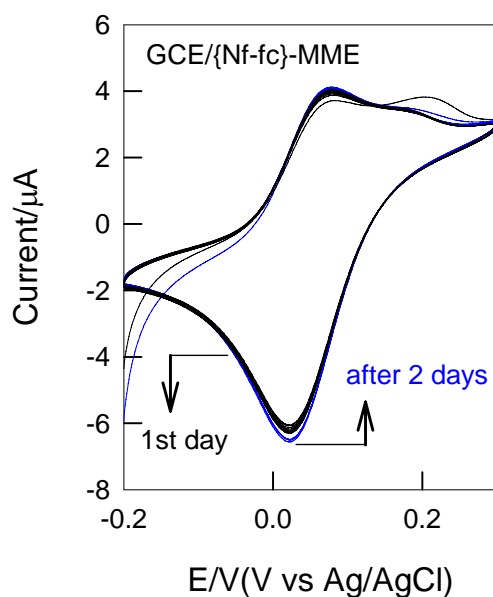

Figure S1. Cyclic voltammetric response of GCE/{Nf-fc}-MME in pH 7 PBS recorded at different days. Scan rate = 50 mV/s.
